# Supplementary material for: A conductive hydrogel with excellent self-adhesion, sensitivity, and stability for wearable strain sensors to monitor human motion
Source: Royal Society of Chemistry journal article supplement (doi:10.1039/d4ta05331a), 2024-01-01
Supplement: d4ta05331a1.pdf [file d4ta05331a1.pdf]

## Supporting Information for

### **A conductive hydrogel with excellent self-adhesion, sensitivity, and stability for wearable strain sensors to monitor human motion**

Huanxin Huo<sup>a,b,#</sup>, Haoran Shi<sup>a,b,#</sup>, Hongxing Yang<sup>a,b</sup>, Xu Zhang<sup>a,b</sup>, Jianyong Wan<sup>a,b,\*</sup>,

Jingjie Shen<sup>a,b,\*</sup>, Guanben Du<sup>a,b,c</sup>, Long Yang<sup>a,b,c,\*</sup>

<sup>a</sup> Yunnan Province Key Lab of Wood Adhesives and Glued Products, Southwest Forestry University, Kunming 650224, China

<sup>b</sup> Yunnan International Joint R&D Center of Wood and Bamboo Biomass Materials, Southwest Forestry University, Kunming 650224, China

<sup>c</sup> International Joint Research Center for Biomass Materials, Southwest Forestry University, Kunming 650224, China

# These two authors contributed to this work equally

\*Corresponding Authors

E-mail: jywan@swfu.edu.cn (J. Wan); shenjj@swfu.edu.cn (J. Shen);

lyang@swfu.edu.cn (L. Yang)

**Table S1.** The compositions of the PAA/CS-DOPA/Zn<sup>2+</sup> hydrogels.

| Sample                                        | AA<br>(g) | CS-DOPA<br>(g) | MBA<br>(mg) | ZnCl <sub>2</sub><br>(g) | APS<br>(g) | H <sub>2</sub> O<br>(g) |
|-----------------------------------------------|-----------|----------------|-------------|--------------------------|------------|-------------------------|
| PAA                                           | 2.5       | 0              | 3           | 0.3                      | 0.025      | 7.5                     |
| PAA/CS-DOPA <sub>0.5</sub> /Zn <sup>2+</sup>  | 2.5       | 0.05           | 3           | 0.3                      | 0.025      | 7.5                     |
| PAA/CS-DOPA <sub>1</sub> /Zn <sup>2+</sup>    | 2.5       | 0.1            | 3           | 0.3                      | 0.025      | 7.5                     |
| PAA/CS-DOPA <sub>1.5</sub> /Zn <sup>2+</sup>  | 2.5       | 0.15           | 3           | 0.3                      | 0.025      | 7.5                     |
| PAA/CS-DOPA <sub>1.75</sub> /Zn <sup>2+</sup> | 2.5       | 0.175          | 3           | 0.3                      | 0.025      | 7.5                     |
| PAA/CS-DOPA <sub>2</sub> /Zn <sup>2+</sup>    | 2.5       | 0.2            | 3           | 0.3                      | 0.025      | 7.5                     |
| PAA/CS-DOPA <sub>2.5</sub> /Zn <sup>2+</sup>  | 2.5       | 0.25           | 3           | 0.3                      | 0.025      | 7.5                     |
| PAA/CS-DOPA <sub>3</sub> /Zn <sup>2+</sup>    | 2.5       | 0.3            | 3           | 0.3                      | 0.025      | 7.5                     |

**Table S2.** Absorbance at 290 nm for various concentrations of DOPA standard solutions

| Concentration of L-DOPA (mg/ml) | Absorbance |
|---------------------------------|------------|
| 0.075                           | 0.59       |
| 0.11                            | 0.736      |
| 0.135                           | 0.843      |
| 0.145                           | 0.891      |
| 0.165                           | 1.023      |

**Table S3.** Percentage of elements C, N, and O in PAA and PCDZ. (SEM)

| Element | PAA   |            |       | PCDZ  |            |       |
|---------|-------|------------|-------|-------|------------|-------|
|         | Wt %  | Wt % sigma | At %  | Wt %  | Wt % sigma | At %  |
| C       | 55.99 | 0.09       | 62.89 | 52.70 | 0.23       | 59.71 |
| N       | 0     | 0.25       | 0.00  | 0.47  | 0.36       | 0.45  |
| O       | 44.01 | 0.09       | 37.11 | 46.83 | 0.2        | 39.84 |

Table S4. Percentage of C1s, N1s, O1s and Zn2p in PAA and PCDZ. (XPS)

| PAA  |          |          | PCDZ |          |          |
|------|----------|----------|------|----------|----------|
| Name | Start BE | Atomic % | Name | Start BE | Atomic % |
| C1s  | 284.17   | 70.14    | C1s  | 284.31   | 55.49    |
| N1s  | 401.06   | 2.51     | N1s  | 401.38   | 3.06     |
| O1s  | 531.69   | 27.35    | O1s  | 532.07   | 36.46    |
| Zn2p |          | 0        | Zn2p | 1022.55  | 4.99     |

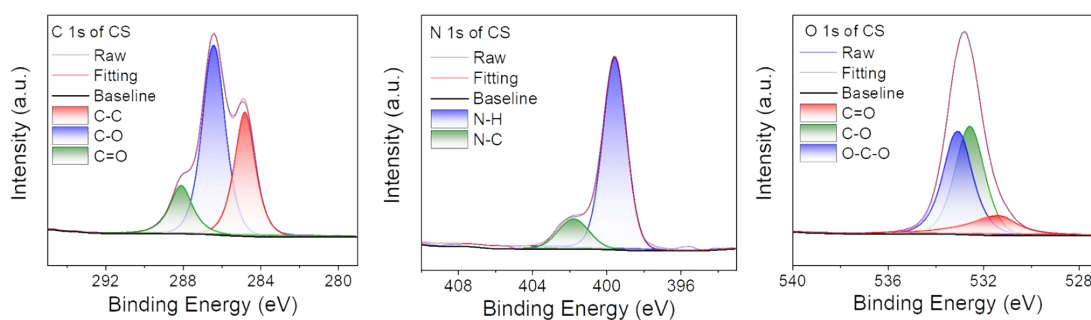

Fig. S1. XPS spectra of C1s N1s and O1s of CS.

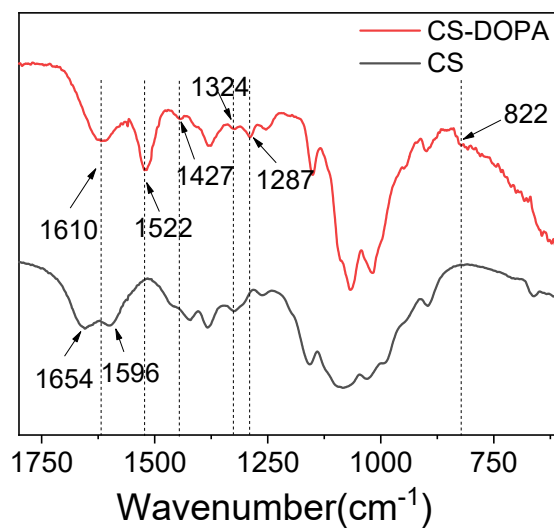

Fig. S2. FT-IR spectra of CS-DOPA.

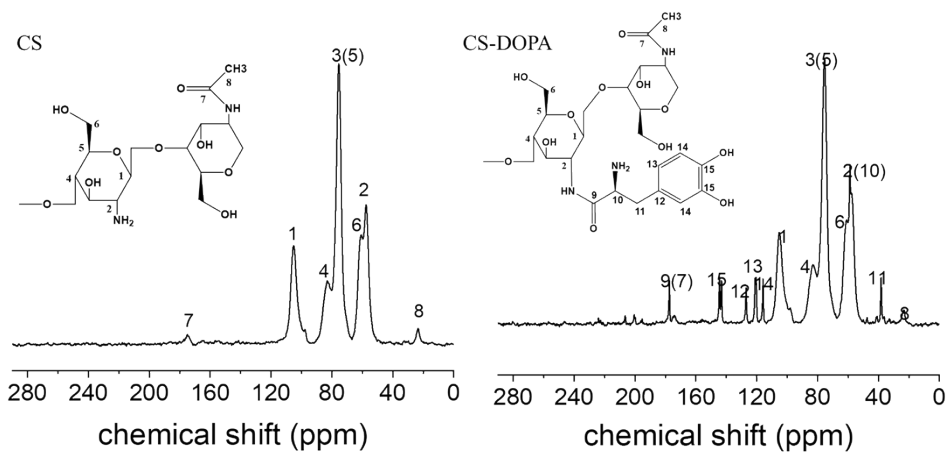

**Fig. S3.** solid-state  $^{13}\text{C}$ NMR and  $^1\text{H}$ NMR spectra of CS and CS-DOPA.

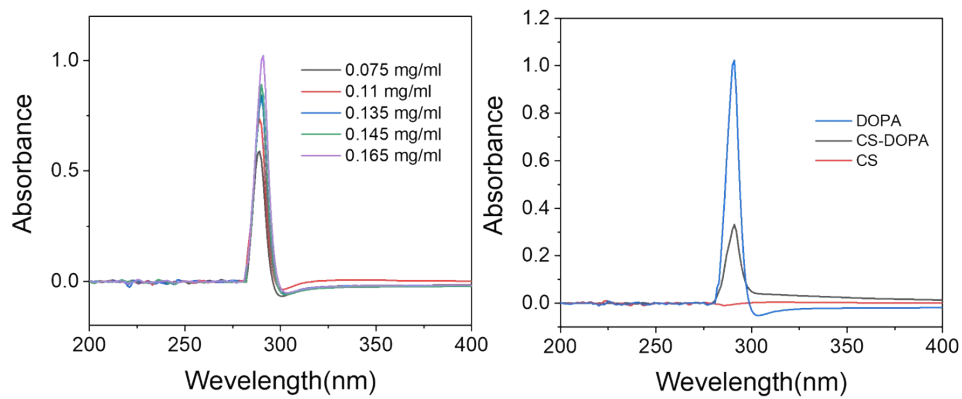

**Fig. S4.** UV-vis spectra for varying CS-DOPA concentrations and UV-vis spectra for CS, CS-DOPA, and DOPA at 16 mg/ml.

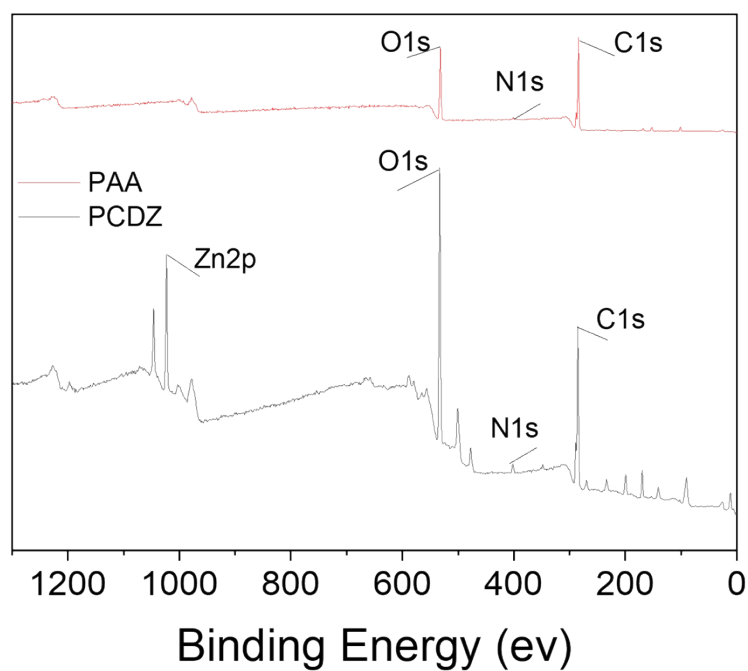

**Fig. S5.** X-ray photoelectron spectroscopy (XPS) of PAA and PCDZ.

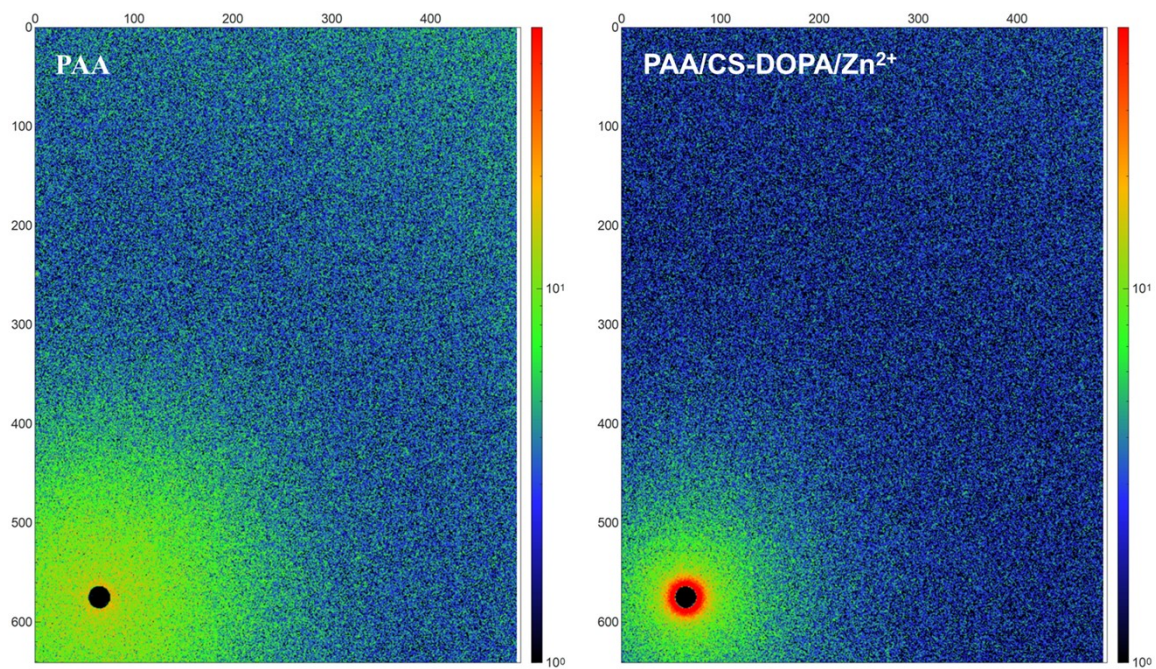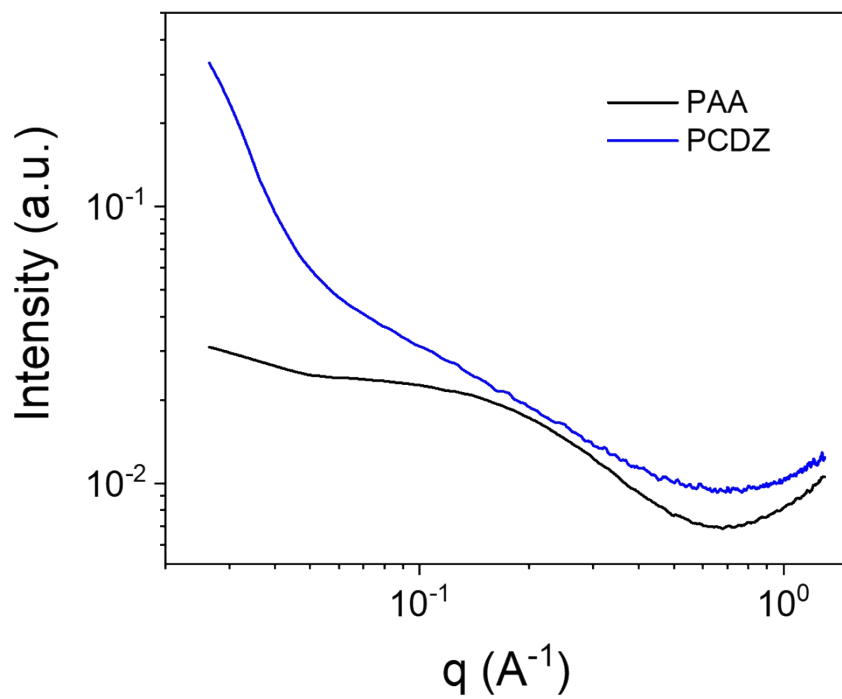

**Fig. S6.** 2D SAXS and SAXS profiles of PAA and PCDZ hydrogels

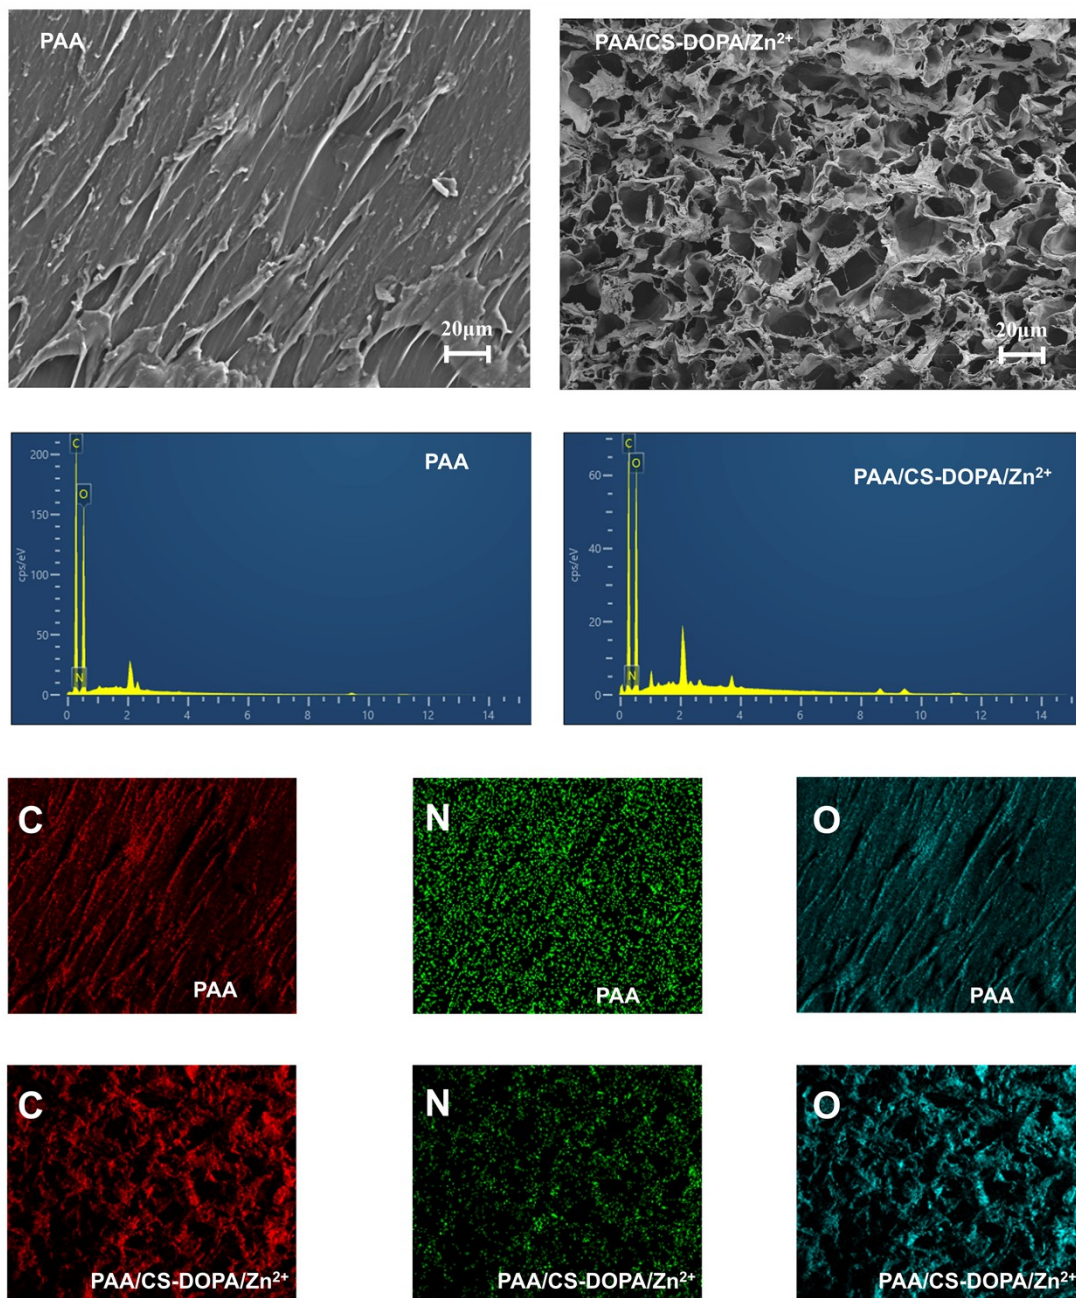

**Fig. S7.** The SEM and EDS of PAA and PCDZ, and its corresponding C, N and O EDS mappings.

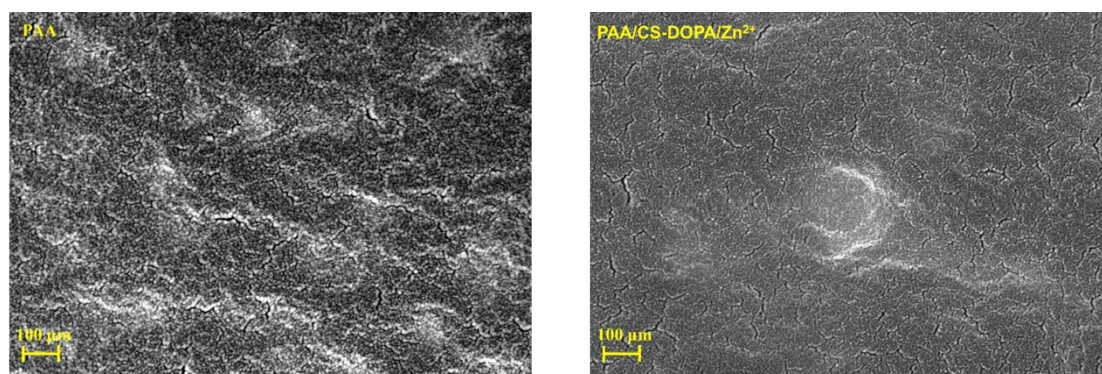

**Fig. S8.** The FESEM of PAA and PCDZ

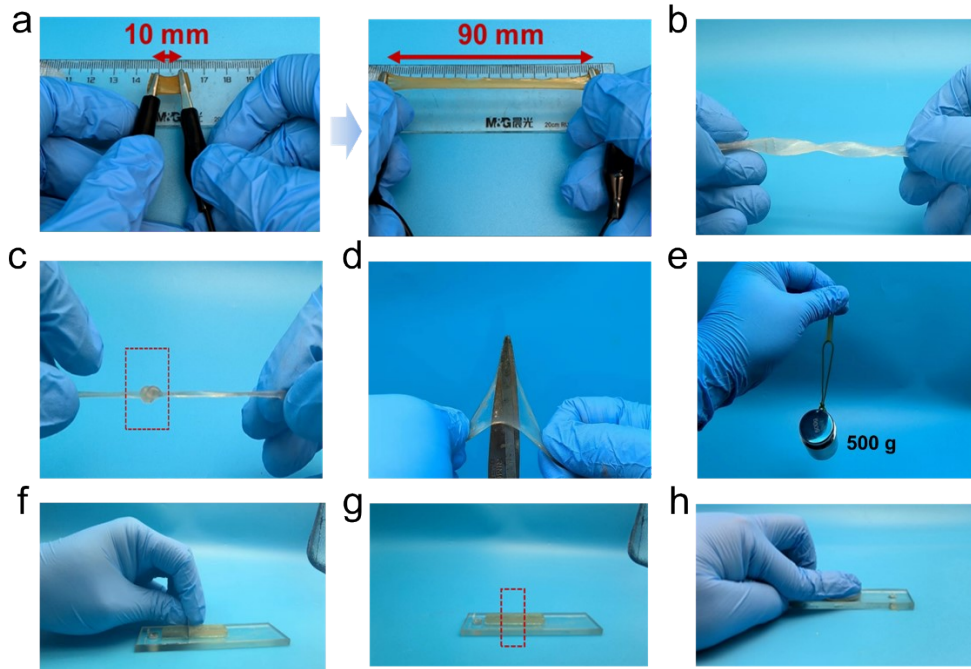

**Fig. S9.** Pictures of PCDZ hydrogels (a) stretching, (b) twisting, (c) knotting, (d) puncturing, (e) lifting a weight of 500g, (f) being pressed by a razor blade, (g) springing back and (h) compression.

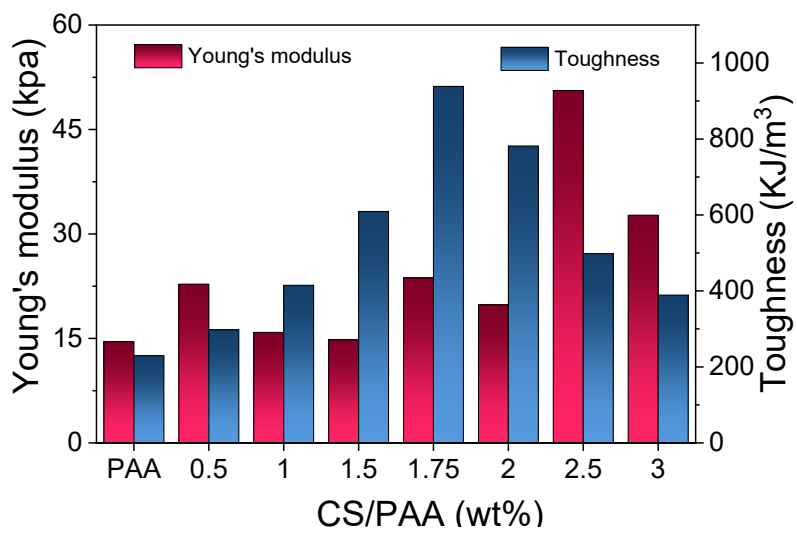

**Fig. S10.** Young modulus and toughness of PCDZ hydrogels with different CS-DOPA

contents.

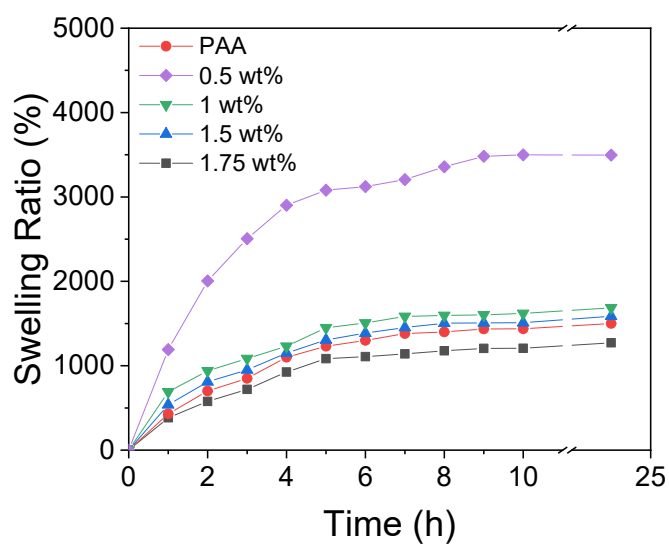

**Fig. S11.** Swelling curves of hydrogels with different CS-DOPA contents.

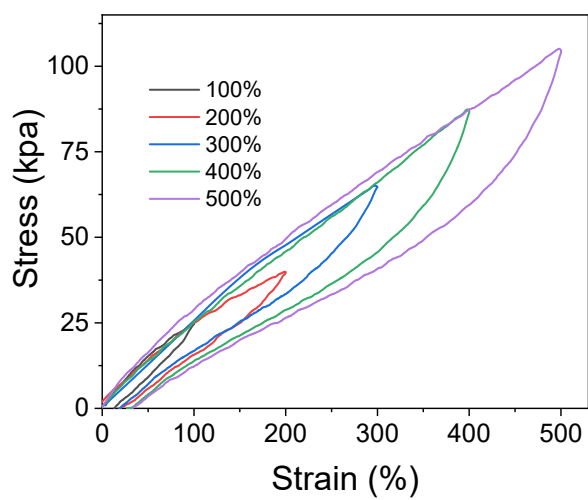

**Fig. S12.** Continuous tensile loading-unloading curves of hydrogels at different strains during stretching.



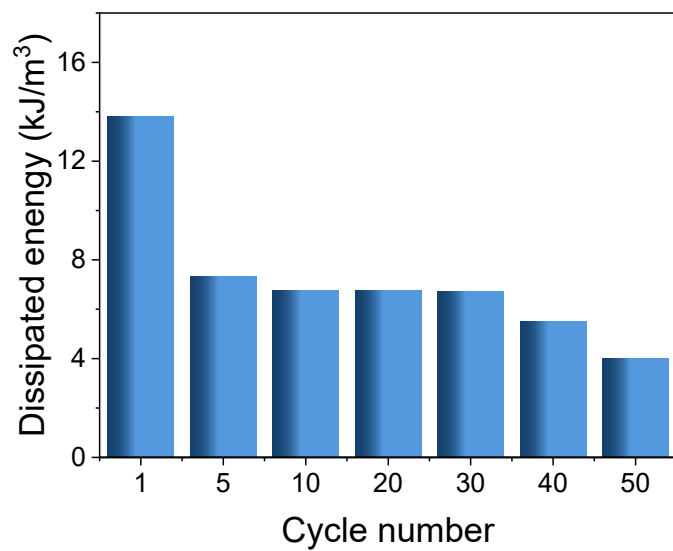

**Fig. S13.** Dissipated energy of hydrogels at various strains during the stretching process.

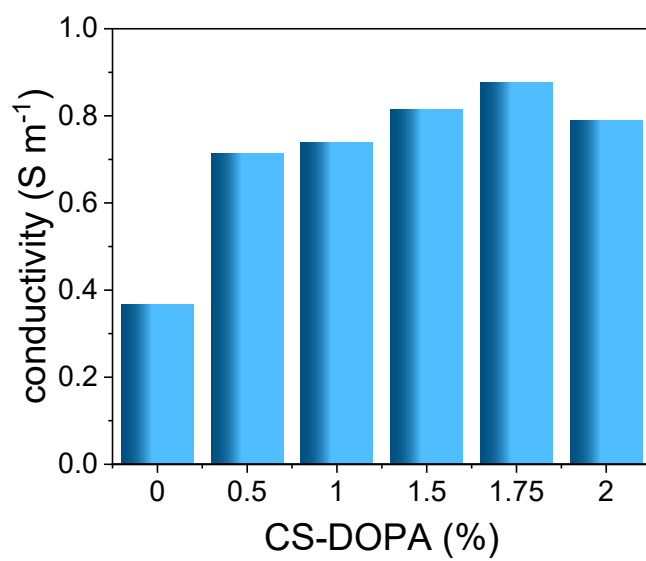

**Fig. S14.** Conductivity of hydrogels with different CS-DOPA contents.

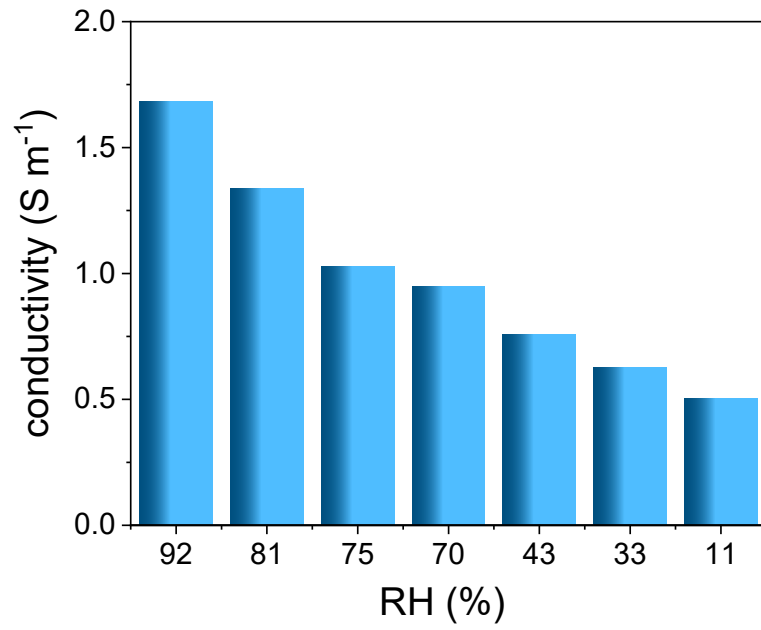

**Fig. S15.** Conductivity of hydrogels at various humidity levels.

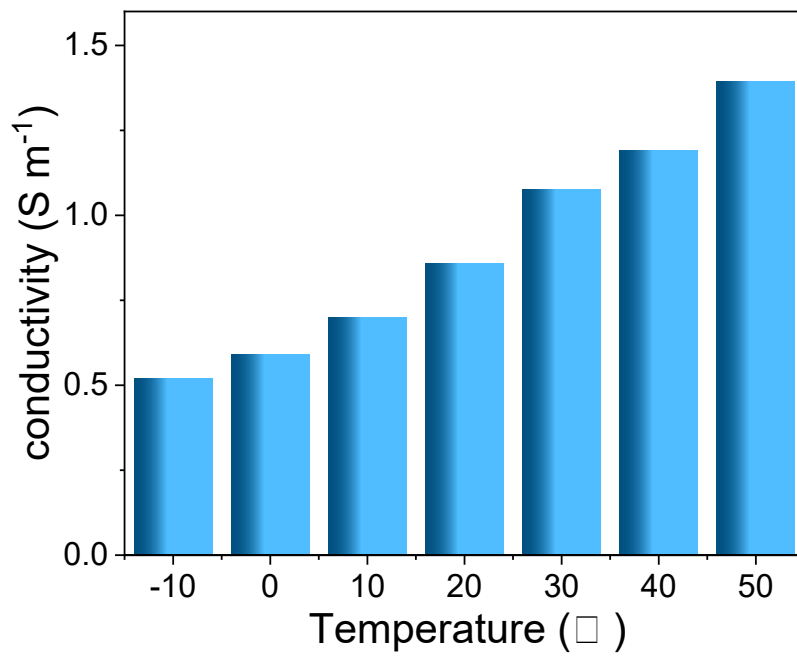

**Fig. S16.** Conductivity of hydrogels at varying temperatures.

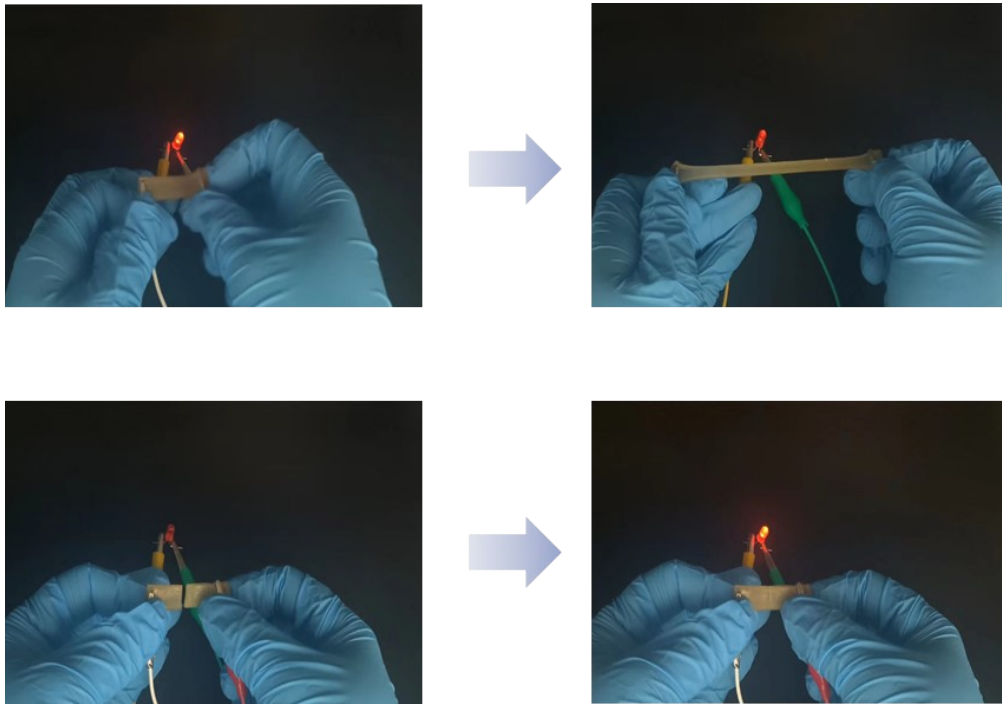

**Fig. S17.** Illustrates the brightness variation of an LED bulb during the stretching process, as well as the restoration of brightness after cutting and reconnecting the LED bulb.

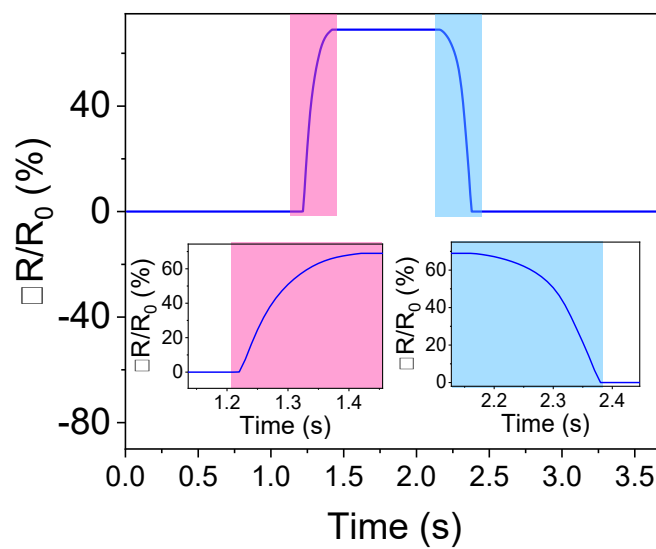

**Fig. S18.** Response time and recovery time of the hydrogel.
